# Supplementary material for: Daratumumab plus bortezomib and dexamethasone versus bortezomib and dexamethasone in relapsed or refractory multiple myeloma: updated analysis of CASTOR
Source: PubMed Central journal article supplement — Haematologica. 2018 Sep 20;103(12):2079–87. doi: 10.3324/haematol.2018.194118 (PMC6269293; doi:10.3324/haematol.2018.194118), 2018-12
Supplement: 2018_194118-Disclosures_and_Contributions.pdf [file 2018_194118-Disclosures_and_Contributions.pdf]

Haematologica  
HAEMATOL/2018/194118  
Version 3

Daratumumab plus bortezomib and dexamethasone versus bortezomib  
and dexamethasone in relapsed or refractory multiple myeloma:  
updated analysis of CASTOR

Andrew Spencer, Suzanne Lentzsch, Katja Weisel, Hervé  
Avet-Loiseau, Tomer M. Mark, Ivan Spicka, Tamas Masszi, Birgitta  
Lauri, Mark-David Levin, Alberto Bosi, Vania Hungria, Michele Cavo,  
Je-Jung Lee, Ajay K. Nooka, Hang Quach, Cindy Lee, Wolney Barreto,  
Paolo Corradini, Chang-Ki Min, Emma C. Scott, Asher A.  
Chanan-Khan, Noemi Horvath, Marcelo Capra, Meral Beksac, Roberto  
Ovilla, Jae-Cheol Jo, Ho-Jin Shin, Pieter Sonneveld, David Soong,  
Tineke Casneuf, Christopher Chiu, Himal Amin, Ming Qi, Piruntha  
Thiyagarajah, A. Kate Sasser, Jordan M. Schechter, and Maria-Victoria  
Mateos

Disclosures: AS received research funding and personal fees from Janssen Cilag. SL holds stock and/or stock options at Caelum Biosciences; consulted for Bristol-Myers Squibb, Celgene, and Janssen; and served on a speakers bureau for Axiom (Takeda). KW received honoraria from and consulted for Amgen, Bristol-Myers Squibb, Celgene, Janssen, Novartis, Takeda, and Onyx; received research funding from Janssen, Celgene, Amgen, and Sanofi; and received travel expenses from Amgen, Bristol-Myers Squibb, Celgene, Janssen, Novartis, and Takeda. HA-L received honoraria from and served on a speakers bureau for Celgene, Amgen, Bristol-Myers Squibb, Sanofi, and Janssen; and received research funding from Celgene and Janssen. IS served as a consultant for Bristol-Myers Squibb, Celgene, Amgen, and Janssen Cilag; received research funding from Celgene; received honoraria from Bristol-Myers Squibb, Celgene, Amgen, Janssen Cilag, and Millennium; and was a member of the advisory committee for Bristol-Myers Squibb, Celgene, and Janssen Cilag. M-DL received honoraria from Janssen, Sandoz, Roche, AbbVie, Celgene, and Amgen. VH served as a consultant or advisor for Amgen, Celgene, Janssen, and Takeda. M Cavo received honoraria from Bristol-Myers Squibb, Celgene, Amgen, Janssen, and Takeda. J-JL is an employee of Chonnam National University Hwasun Hospital, Hwasun, Jeollanamdo, South Korea. AKN consulted for Amgen, Novartis, and Spectrum. HQ received honoraria from and consulted for Amgen, Janssen-Cilag, Takeda, and Celgene and received research funding from Amgen and Celgene. CL received honoraria from and consulted for Amgen, Janssen-Cilag, Takeda, and Celgene. PC consulted for Takeda and received honoraria from Celgene, Janssen, Novartis, Roche, Takeda, Sanofi, Servier, and Gilead. ECS received research funding from Takeda and Amgen and has served on advisory boards for Novartis, Incyte, Takeda, and Amgen. AAC-K received research funding from the Mayo Clinic. NH served on the board of directors or advisory committees for Janssen. M Capra served on a speakers bureau for Janssen. MB received honoraria from and participated in advisory boards for Celgene, BMS, Amgen, Novartis, Janssen-Cilag, and Takeda. RO consulted for Janssen. PS received research funding from Janssen, Celgene, Amgen, Karyopharm, SkylineDx, Takeda, and Novartis and received personal fees from Janssen, Celgene, and Amgen. DS, TC, CC, HA, MQ, PT, and JMS are employees of Janssen. TC, AKS, MQ, and JMS hold equity in Johnson & Johnson. AKS is a former employee of Janssen and is a current employee of Genmab. M-VM received honoraria from and consulted for Janssen, Celgene, Takeda, and Amgen. TMM, TM, BL, AB, WB, C-KM, J-CJ, and H-JS declare no conflicts of interest.

Contributions: All authors were involved in the study design and/or data interpretation, and drafting, critically reviewing, and revising the manuscript. AS, SL, KW, T Mark, IS, T Masszi, BL, M-DL, AB, VH, MC, J-JL, AKN, HQ, CL, WB, PC, C-KM, ECS, AAC-K, NH, MC, MB, RO, J-CJ, H-JS, PS, and M-VM contributed to the accrual and treatment of patients. HA-L, DS, TC, CC, HA, MQ, PT, AKS, and JS collected and/or analyzed the data. All authors approved submitting the manuscript for publication, and being accountable for the accuracy and integrity of the study.
